# Supplementary material for: Valorization of Bayer Red Mud in a Circular Economy Process: Valuable Metals Recovery and Further Brick Manufacture
Source: MDPI journal article supplement (doi:10.3390/pr10112367), 2022-11-11
Supplement: s1 [file s1]

|                                                                                     |                                                                                                          |
|-------------------------------------------------------------------------------------|----------------------------------------------------------------------------------------------------------|
|    | $Cr = 19.86 - 0.0973 \cdot \frac{L}{S} + 0.904 \cdot t + 0.300 \cdot \frac{L}{S} \cdot t$ $R^2 = 0.9277$ |
|   | $Cu = 6.045 + 0.118 \cdot \frac{L}{S} + 0.36 \cdot t$ $R^2 = 0.9197$                                     |
|  | $Mn = 2.77 + 1.23 \cdot \frac{L}{S} + 1.17 \cdot t$ $R^2 = 0.9564$                                       |
|  | $Mo = -0.102 + 0.037 \cdot \frac{L}{S} + 0.85 \cdot t + 0.012 \cdot \frac{L}{S} \cdot t$ $R^2 = 0.9940$  |

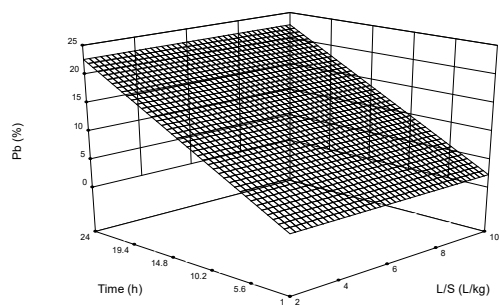

$$Pb = 1.30 + 0.0107 \cdot \frac{L}{S} + 0.887 \cdot t$$

$$R^2 = 0,7523$$

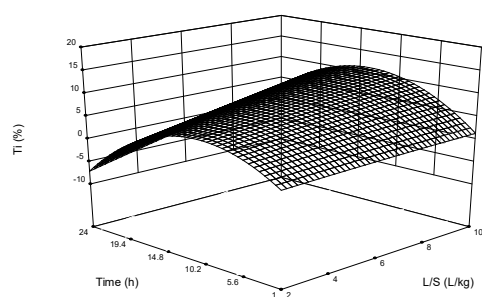

$$Ti = -1.25 + 0.19 \cdot \frac{L}{S} + 1.31 \cdot t + 0.05 \cdot \frac{L}{S} \cdot t - 0.0095 \cdot \frac{L^2}{S} - 0.07 \cdot t^2$$

$$R^2 = 0.9901$$

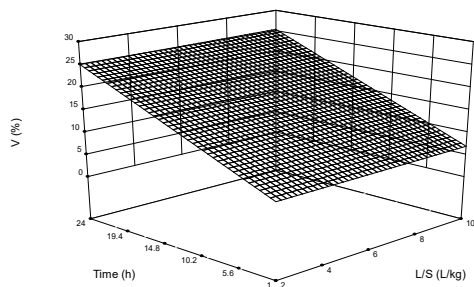

$$V = 5.712 + 0.048 \cdot \frac{L}{S} + 0.804 \cdot t$$

$$R^2 = 0.7733$$

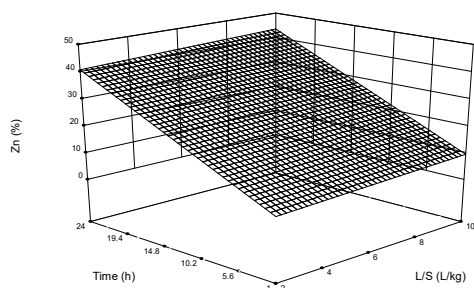

$$Zn = 4.72 + 0.34 \cdot \frac{L}{S} + 1.48 \cdot t$$

$$R^2 = 0.9301$$

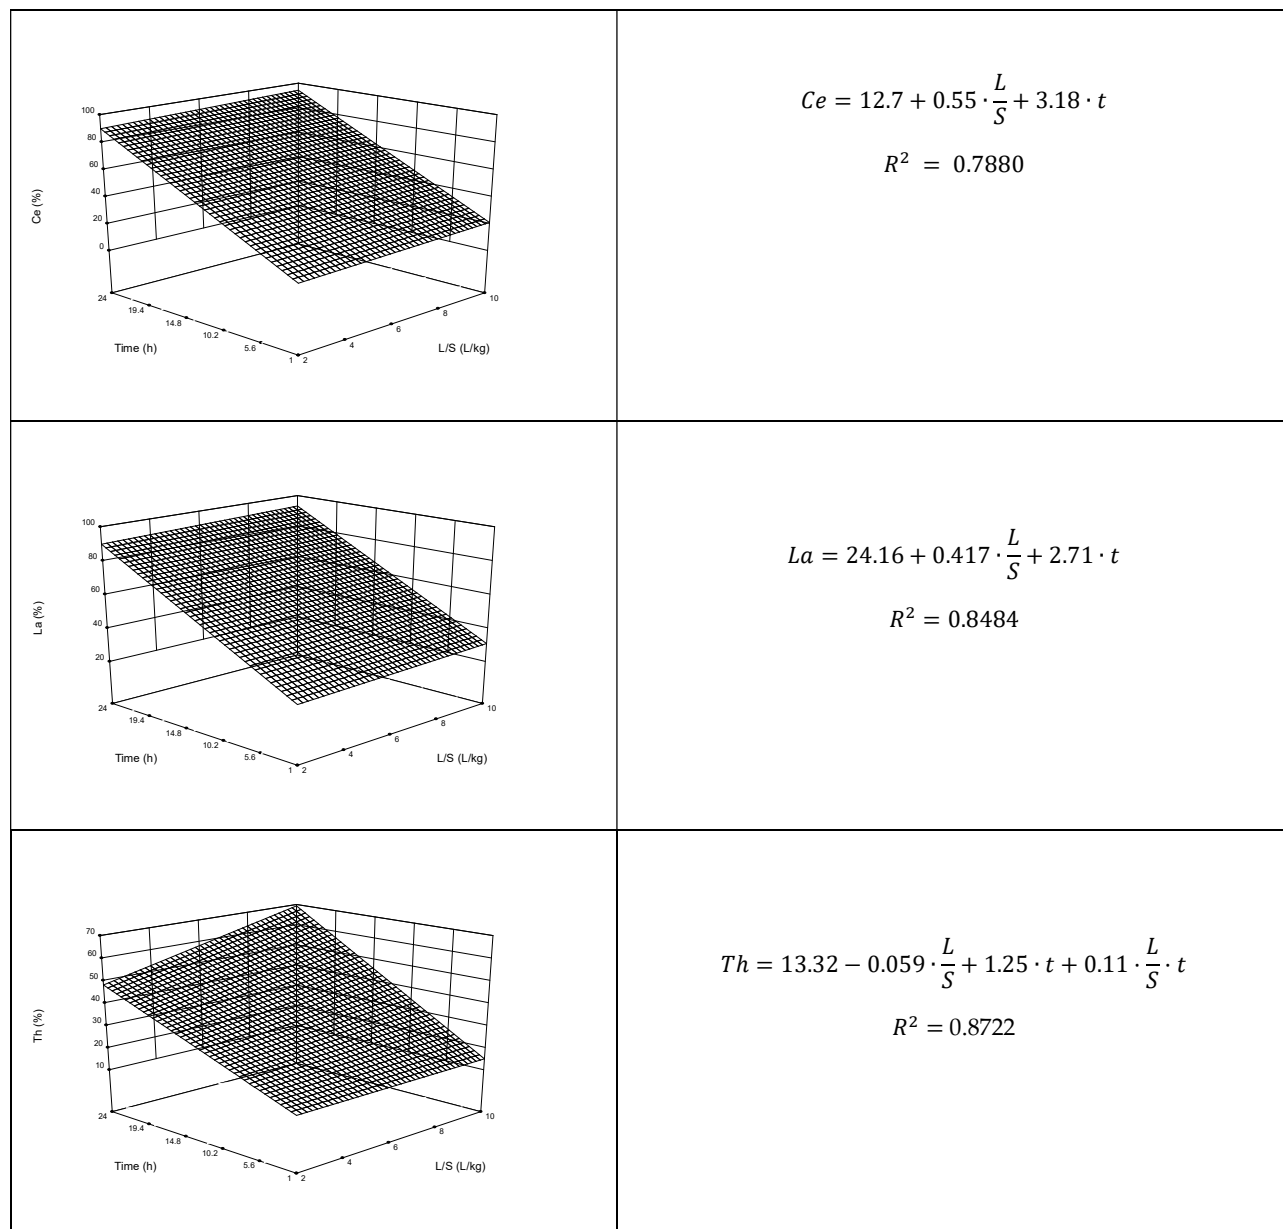

**Figure S1.** Metal leaching yields: mathematical model and response surfaces.

Table S1. Statistical analyses of metal leaching yields mathematical models.

4

| Source                     | Sum of squares | df | Mean of squares | F-value | P-value |
|----------------------------|----------------|----|-----------------|---------|---------|
| <b>Cr-Model</b>            | 0.5902         | 3  | 0.1967          | 48.07   | <0.0001 |
| L/S ratio                  | 0.0773         | 1  | 0.0773          | 18.90   | 0.0025  |
| Leaching time              | 0.4078         | 1  | 0.4078          | 99.63   | <0.0001 |
| L/S-time                   | 0.0372         | 1  | 0.0372          | 9.08    | 0.0167  |
| Residual error             | 0.0327         | 8  | 0.0041          |         |         |
| <b>Total</b>               | 0.6230         | 11 |                 |         |         |
| <b>Cu-Model</b>            | 5372.01        | 3  | 1790.67         | 68.82   | <0.0001 |
| L/S ratio                  | 2359.24        | 1  | 2359.24         | 90.67   | <0.0001 |
| Leaching time              | 977.7          | 1  | 977.70          | 37.58   | 0.0003  |
| L/S-time                   | 718.20         | 1  | 718.20          | 27.60   | 0.0008  |
| Residual error             | 208.15         | 8  | 26.02           |         |         |
| <b>Total</b>               | 5580.17        | 11 |                 |         |         |
| <b>Mn-Model</b>            | 50.39          | 2  | 25.19           | 25.09   | 0.0002  |
| L/S ratio                  | 33.80          | 1  | 33.80           | 33.66   | 0.0003  |
| Leaching time              | 16.58          | 1  | 16.58           | 16.51   | 0.0028  |
| Residual error             | 9.04           | 9  | 1.00            |         |         |
| <b>Total</b>               | 59.43          | 11 |                 |         |         |
| <b>Mo-Model</b>            | 185.08         | 5  | 37.02           | 24.49   | 0.0006  |
| L/S ratio                  | 44.15          | 1  | 44.15           | 23.21   | 0.0017  |
| Leaching time              | 0.0165         | 1  | 0.0165          | 0.0109  | 0.9201  |
| L/S-time                   | 4.45           | 1  | 4.45            | 2.94    | 0.1370  |
| L/S <sup>2</sup>           | 17.86          | 1  | 17.86           | 11.82   | 0.0138  |
| Leaching time <sup>2</sup> | 1.70           | 1  | 1.70            | 1.13    | 0.3295  |
| Residual error             | 9.07           | 6  | 1.15            |         |         |
| <b>Total</b>               | 194.15         | 11 |                 |         |         |
| <b>Pb-Model</b>            | 75.65          | 3  | 25.22           | 443.44  | <0.0001 |
| L/S ratio                  | 2.39           | 1  | 2.39            | 42.00   | 0.0002  |
| Leaching time              | 74.11          | 1  | 74.11           | 1303.16 | <0.0001 |
| L/S-time                   | 1.57           | 1  | 1.57            | 27.69   | 0.0008  |
| Residual error             | 0.4550         | 8  | 0.0569          |         |         |
| <b>Total</b>               | 76.11          | 11 |                 |         |         |
| <b>Ti-Model</b>            | 129.93         | 5  | 25.99           | 22.57   | 0.0008  |
| L/S ratio                  | 0.1268         | 1  | 0.1268          | 0.1101  | 0.7513  |
| Leaching time              | 3.09           | 1  | 3.09            | 2.68    | 0.1525  |
| L/S-time                   | 8.05           | 1  | 8.05            | 6.99    | 0.0383  |
| L/S <sup>2</sup>           | 0.2804         | 1  | 0.2804          | 0.2435  | 0.6392  |
| Leaching time <sup>2</sup> | 12.91          | 1  | 12.91           | 11.21   | 0.0155  |
| Residual error             | 6.91           | 6  | 1.15            |         |         |
| <b>Total</b>               | 136.83         | 11 |                 |         |         |
| <b>V-Model</b>             | 182.12         | 5  | 36.43           | 158.72  | <0.0001 |
| L/S ratio                  | 23.13          | 1  | 23.13           | 100.79  | <0.0001 |
| Leaching time              | 0.0513         | 1  | 0.0513          | 0.2234  | 0.6531  |
| L/S-time                   | 23.98          | 1  | 23.98           | 104.47  | <0.0001 |

|                                  |         |    |         |       |         |
|----------------------------------|---------|----|---------|-------|---------|
| <b>L/S<sup>2</sup></b>           | 0.6902  | 1  | 0.6902  | 3.01  | 0.1336  |
| <b>Leaching time<sup>2</sup></b> | 2.84    | 1  | 2.84    | 12.39 | 0.0125  |
| <b>Residual</b>                  | 1.38    | 6  | 0.2295  |       |         |
| <b>Cor Total</b>                 | 183.53  | 11 |         |       |         |
| <b>Zn-Model</b>                  | 97.46   | 2  | 48.73   | 29.81 | 0.0001  |
| <b>L/S ratio</b>                 | 13.09   | 1  | 13.09   | 8.01  | 0.0197  |
| <b>Leaching time</b>             | 84.38   | 1  | 84.38   | 51.62 | <0.0001 |
| <b>Residual error</b>            | 14.71   | 9  | 1.63    |       |         |
| <b>Total</b>                     | 112.18  | 11 |         |       |         |
| <b>Ce-Model</b>                  | 462.10  | 2  | 231.05  | 6.66  | 0.0168  |
| <b>L/S ratio</b>                 | 175.55  | 1  | 175.55  | 5.06  | 0.0511  |
| <b>Leaching time</b>             | 286.55  | 1  | 286.55  | 8.26  | 0.0184  |
| <b>Residual error</b>            | 312.29  | 9  | 34.70   |       |         |
| <b>Total</b>                     | 774.39  | 11 |         |       |         |
| <b>La-model</b>                  | 1910.02 | 2  | 955.01  | 53.02 | <0.0001 |
| <b>L/S ratio</b>                 | 589.17  | 1  | 589.17  | 32.71 | 0.0003  |
| <b>Leaching time</b>             | 1320.85 | 1  | 1320.85 | 73.33 | <0.0001 |
| <b>Residual error</b>            | 162.11  | 9  | 18.01   |       |         |
| <b>Total</b>                     | 2072.13 | 13 |         |       |         |
| <b>Th-Model</b>                  | 1765.66 | 2  | 882.83  | 25.35 | 0.0002  |
| <b>L/S ratio</b>                 | 805.01  | 1  | 805.01  | 23.12 | 0.0010  |
| <b>Leaching time</b>             | 960.65  | 1  | 960.65  | 27.58 | 0.0005  |
| <b>Residual error</b>            | 313.44  | 9  | 34.83   |       |         |
| <b>Total</b>                     | 2079.10 | 11 |         |       |         |
